# Supplementary material
Source: publisher figshare collection journal article supplement (https://acs.figshare.com/ndownloader/files/3903469)
Supplement: Supplementary file 1 [file 3903469]

# **Anion F<sup>-</sup>-induced Etching of Silicon Nanowires with Diverse Doping Levels, Surface Crystalline Orientations and Porosity**

*Junjun Liu,<sup>1</sup> and Zhifeng Huang<sup>\*1-4</sup>*

<sup>1</sup>Department of Physics, <sup>2</sup>Institute of Advanced Materials, <sup>3</sup>Partner State Key Laboratory of Environmental and Biological Analysis, Hong Kong Baptist University (HKBU), Kowloon Tong, Hong Kong SAR, P. R. China

<sup>4</sup>HKBU Institute of Research and Continuing Education, A211, Virtual University Park Building, South Area Hi-tech Industrial Park, Shenzhen, Guangdong Province, P. R. China

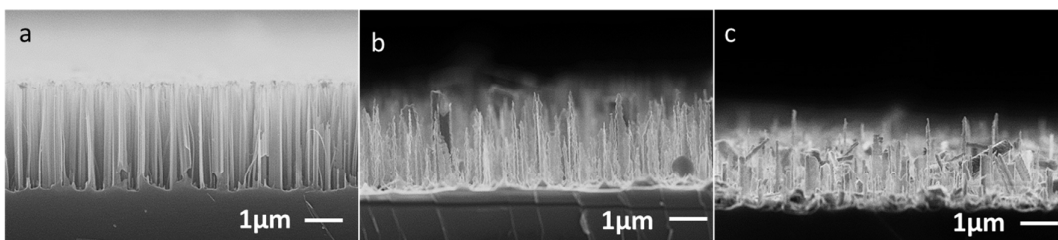

Fig. S1 Etching of  $n^-$ -SiNWs(100) by 40%  $\text{NH}_4\text{F}$  with duration of (a) 1 min, (b) 3 min and (c) 8 min. (a-c) SEM cross sectional images.

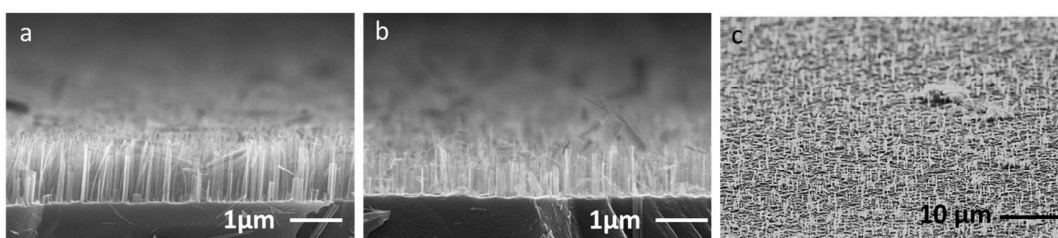

Fig. S2 Etching of  $n^+$ -SiNWs(111) by 40%  $\text{NH}_4\text{F}$  with duration of (a) 1 min, (b) 1.5 min and (c) 2 min. (a, b) SEM cross sectional images, and (c) SEM tilted image.

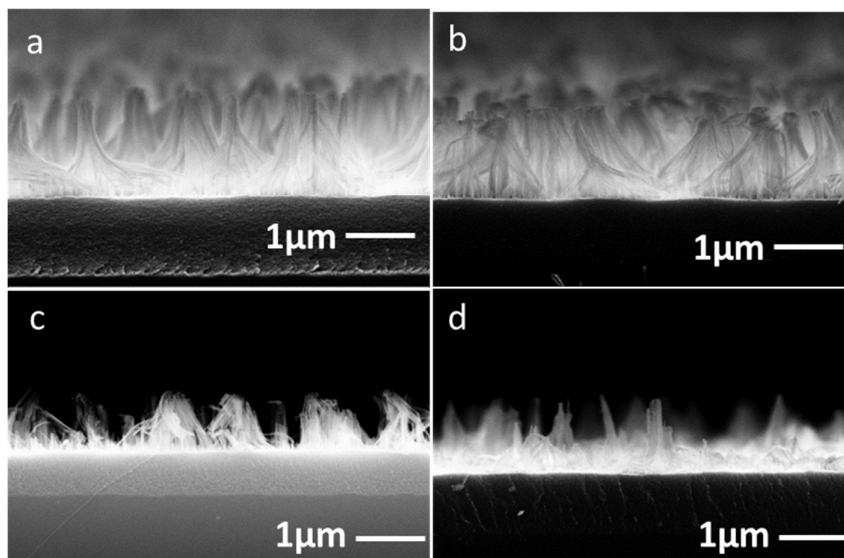

Fig. S3 Etching of  $n^2$ -mpSiNWs(111) by 40%  $\text{NH}_4\text{F}$  with duration of (a) 0 min, (b) 0.5 min, (c) 1 min and (d) 1.5 min. (a-d) SEM cross sectional images.

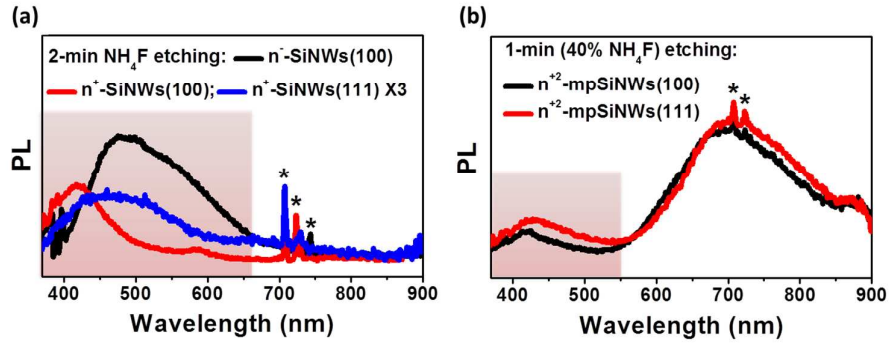

Fig. S4 PL spectra: (a) the three kinds of SiNWs etched by 40%  $\text{NH}_4\text{F}$  for 2 min; (b) the two kinds of mpSiNWs etched by 40%  $\text{NH}_4\text{F}$  for 1 min. The PL intensity of  $n^+$ -SiNWs(111) in (a) is amplified by 3 times. The light pink bands highlight the PL peaks stemming from the F-termination. The system noise in the home-made PL setup generates the peaks marked by asterisks.
